# Supplementary material for: FertDish: microfluidic sperm selection-in-a-dish for intracytoplasmic sperm injection
Source: Royal Society of Chemistry journal article supplement (doi:10.1039/d0lc00874e), 2021-01-01
Supplement: d0lc00874e1.pdf [file d0lc00874e1.pdf]

### Electronic supplementary information (ESI)

### Supplementary information for “FertDish: Microfluidic Sperm Selection-in-a-Dish for Intracytoplasmic Sperm Injection”

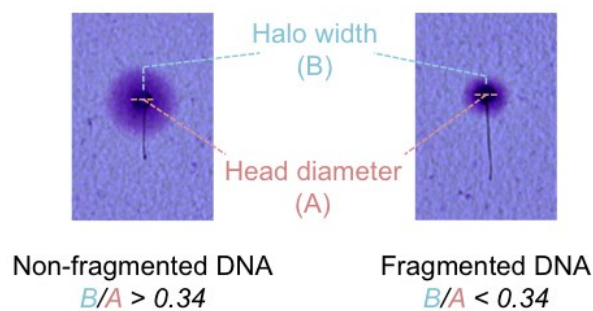

**Fig. S1** The Sperm Chromatin Dispersion assay, depicting sperm with non-fragmented and fragmented DNA based on the ratio between halo width (B) and sperm head diameter (A). Sperm DNA quality is expressed as DNA fragmentation index and distribution of, along with peak, sperm B/A values.
